# Supplementary material
Source: PubMed Central journal article supplement (PMC7965113)
Supplement: 3225_tables.pdf [file 3225_tables.pdf]

**On-line Table 1: Discharge status for the study population**

|                           | All<br>(n = 96) | DCI<br>(n = 48) | No DCI<br>(n = 48) | P<br>Value |
|---------------------------|-----------------|-----------------|--------------------|------------|
| Home                      | 53% (51/96)     | 40% (19/48)     | 67% (32/48)        | .0137      |
| Rehabilitation            | 39% (37/96)     | 52% (25/48)     | 25% (12/48)        | .0114      |
| Acute rehabilitation      | 27% (26/96)     | 35% (17/48)     | 19% (9/48)         |            |
| Long-term skilled nursing | 11% (11/96)     | 17% (8/48)      | 6% (3/48)          |            |
| Death                     | 5% (5/96)       | 8% (4/48)       | 2% (1/48)          | .3616      |
| Unknown                   | 3% (3/96)       | 0               | 6% (3/48)          | .2421      |

**On-line Table 2: Mean quantitative CTP parameters and SD in the DCI (symptomatic) group comparing patients who developed the primary outcome measures of permanent neurologic deficits and cerebral infarction**

|     | Neurologic Deficits<br>(n = 26) |       | No deficit<br>(n = 22) |       | P Value | Infarction<br>(n = 15) |       | No infarction<br>(n = 33) |      | P Value |
|-----|---------------------------------|-------|------------------------|-------|---------|------------------------|-------|---------------------------|------|---------|
|     | Mean                            | SD    | Mean                   | SD    |         | Mean                   | SD    | Mean                      | SD   |         |
| CBF | 26.95                           | 12.73 | 26.23                  | 14.14 | .8536   | 25.03                  | 12.52 | 27.35                     | 13.7 | .5796   |
| CBV | 1.94                            | 0.76  | 1.71                   | 0.52  | .2361   | 1.86                   | 0.85  | 1.82                      | 0.58 | .8496   |
| MTT | 7.48                            | 4.12  | 6.87                   | 2.65  | .5533   | 7.97                   | 4.43  | 6.85                      | 3.01 | .31     |

**On-line Table 3: Mean quantitative CTP parameters and SD in the no DCI (asymptomatic) group comparing patients who developed the primary outcome measures of permanent neurologic deficits and cerebral infarction**

|     | Neurologic Deficits<br>(n = 6) |       | No Deficit<br>(n = 42) |       | P Value | Infarction<br>(n = 2) |       | No Infarction<br>(n = 46) |       | P Value |
|-----|--------------------------------|-------|------------------------|-------|---------|-----------------------|-------|---------------------------|-------|---------|
|     | Mean                           | SD    | Mean                   | SD    |         | Mean                  | SD    | Mean                      | SD    |         |
| CBF | 36.19                          | 17.93 | 40.36                  | 10.27 | .4045   | 40.33                 | 15.41 | 39.81                     | 11.34 | .9501   |
| CBV | 2.15                           | 0.48  | 1.98                   | 0.51  | .4461   | 2.44                  | 0.12  | 1.98                      | 0.51  | .2134   |
| MTT | 5.93                           | 2.84  | 4.52                   | 1.01  | .0196   | 6.56                  | 2.02  | 4.62                      | 1.34  | .054    |
